# Supplementary material for: Graphene–molybdenum oxynitride porous material with improved cyclic stability and rate capability for rechargeable lithium ion batteries
Source: Royal Society of Chemistry journal article supplement (doi:10.1039/c3cp52315b), 2013-01-01
Supplement: c3cp52315b.pdf [file c3cp52315b.pdf]

**Electronic Supplementary Information for**

**Graphene–molybdenum oxynitride porous  
material with improved cyclic stability and rate  
capability for rechargeable lithium ion battery**

Ding Zhou,<sup>ab</sup> Haiping Wu,<sup>a</sup> Zhixiang Wei\*<sup>a</sup> and Bao-Hang Han\*<sup>a</sup>

<sup>a</sup> *National Center for Nanoscience and Technology, Beijing 100190, China*

<sup>b</sup> *College of Chemistry and Molecular Engineering, Peking University, Beijing 100871,  
China*

Tel: +86 10 8254 5576; E-mail: [hanbh@nanoctr.cn](mailto:hanbh@nanoctr.cn).

Tel: +86 10 8254 5565; E-mail: [weizx@nanoctr.cn](mailto:weizx@nanoctr.cn).

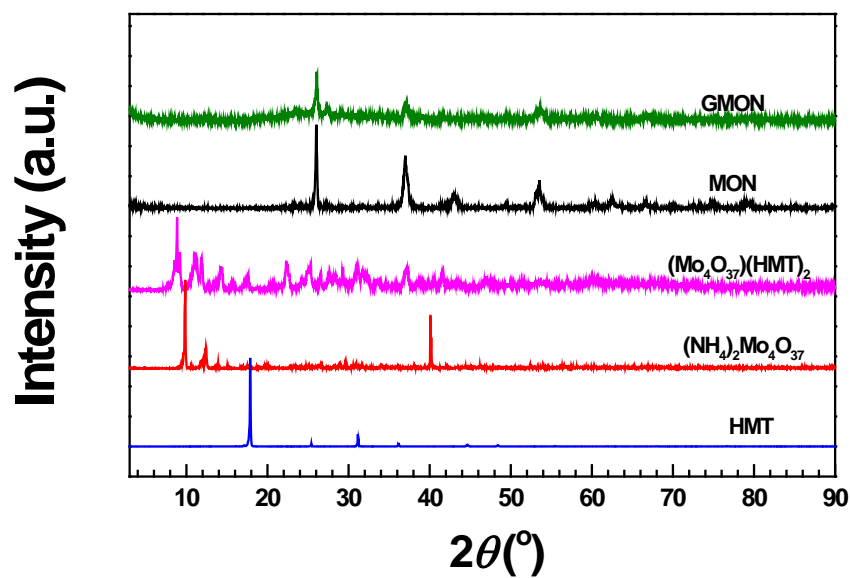

Fig. S1 XRD patterns of the raw materials and GMON materials.

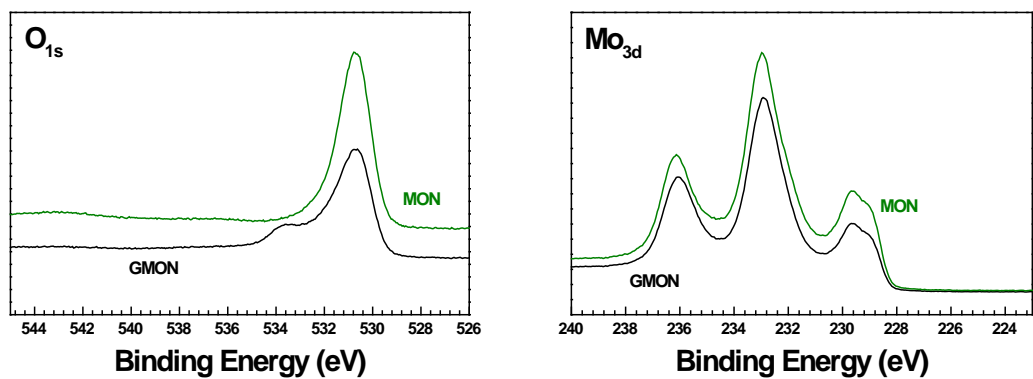

Fig. S2 XPS spectra: O<sub>1s</sub> and Mo<sub>3d</sub> regions analysis of MON and GMON.

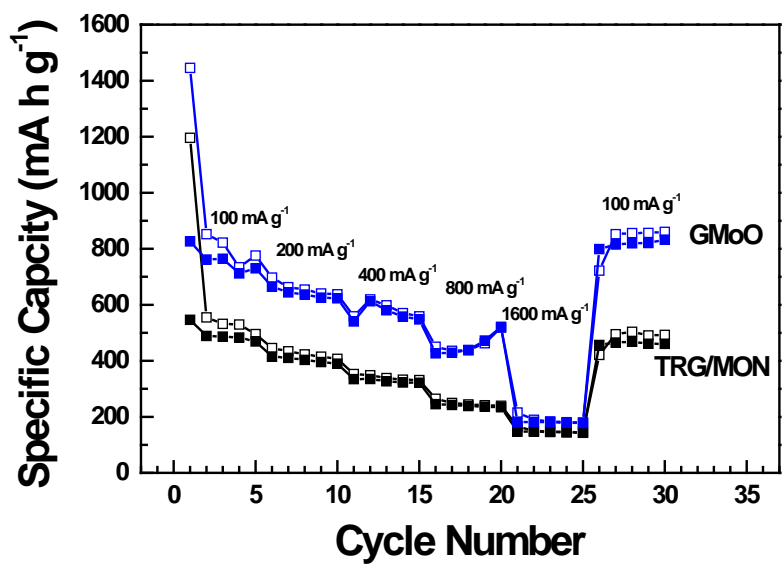

Fig. S3 Rate performances of GMoO and TRG/MON electrodes.

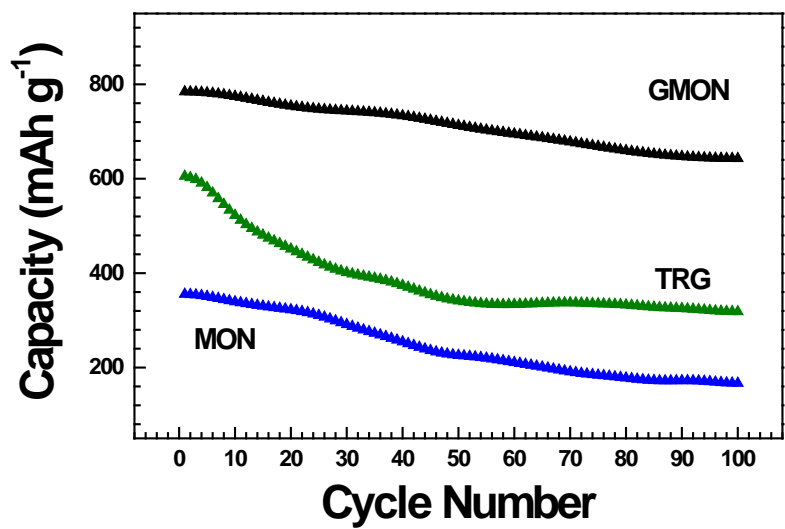

Fig. S4 Cycling performances of TRG, GMON, and MON electrodes at a current density of 200  $\text{mA g}^{-1}$ .

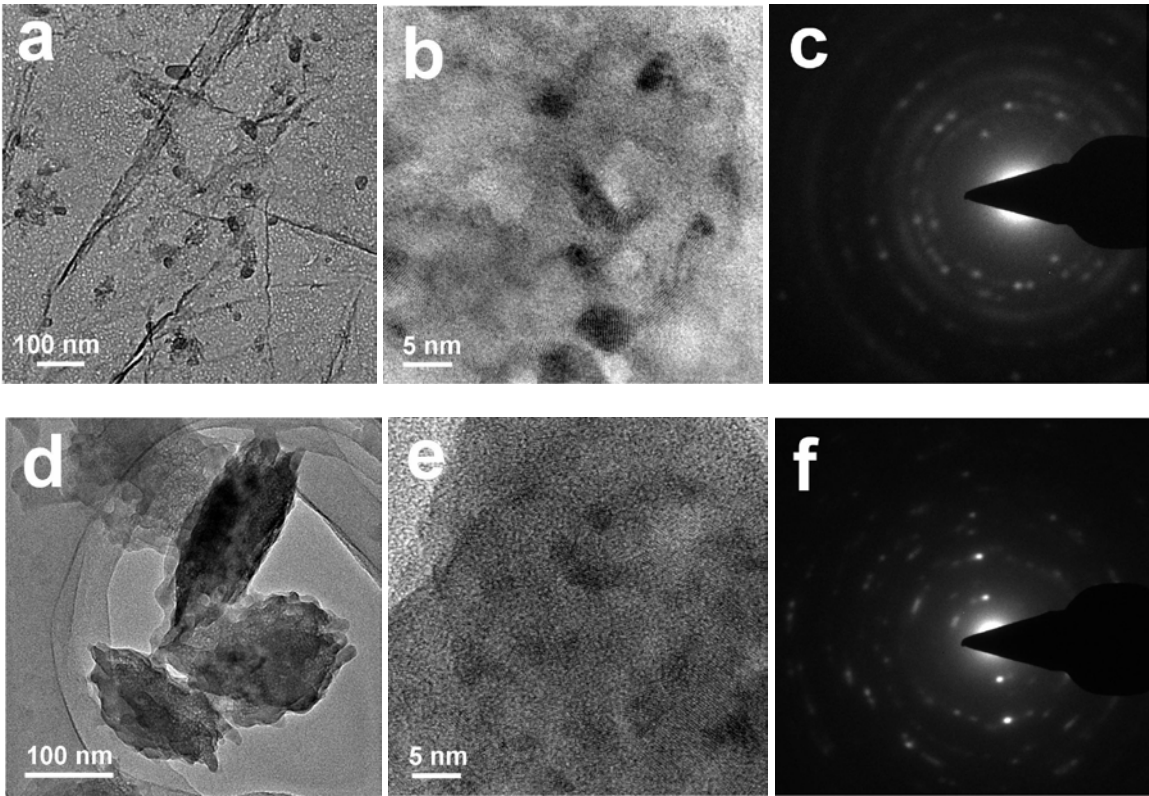

**Fig. S5** TEM images and SAED of GMON (a–c) and MON (d–f) in the anode after rate performance test.

**Table S1.** Averaged specific charge and discharge capacity of the GMoO and TRG/MON anodes at different current densities

| Current Density<br>(mA g <sup>-1</sup> ) | Averaged Specific Capacity (mA h g <sup>-1</sup> ) |           |         |           |
|------------------------------------------|----------------------------------------------------|-----------|---------|-----------|
|                                          | GMoO                                               |           | TRG/MON |           |
|                                          | Charge                                             | Discharge | Charge  | Discharge |
| 100-I                                    | 759.04                                             | 925.92    | 494.77  | 661.76    |
| 200                                      | 639.07                                             | 658.55    | 403.00  | 424.90    |
| 400                                      | 567.92                                             | 581.24    | 328.18  | 340.87    |
| 800                                      | 457.77                                             | 461.12    | 239.45  | 247.91    |
| 1600                                     | 180.14                                             | 189.94    | 145.64  | 150.83    |
| 100-II                                   | 817.57                                             | 829.54    | 462.40  | 480.76    |
